# Supplementary material
Source: MDPI journal article supplement (https://www.mdpi.com/2311-553X/9/3/30)

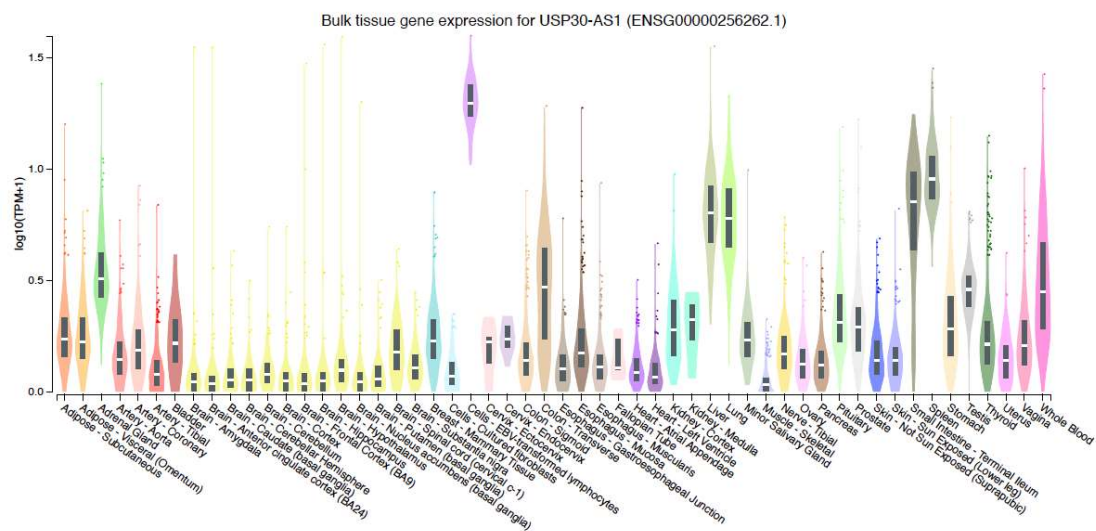

Supplementary Figure 1: Violin plots showing bulk tissue expression for the lncRNA gene *USP30-AS1*.

Supplement: s1 [file s1]
